# Supplementary material for: First insights into the microbial diversity in the omasum and reticulum of bovine using Illumina sequencing
Source: PubMed Central journal article supplement (PMC4543427; doi:10.1007/s13353-014-0258-1), 2015-01-21
Supplement: 13353_2014_258_MOESM5_ESM.pdf [file 13353_2014_258_MOESM5_ESM.pdf]

|          |                     |             | Sample 1 | Sample 2 | Sample 3 |
|----------|---------------------|-------------|----------|----------|----------|
| 0 domain | Bacteria            |             | 785      | 1161     | 1027     |
| 0 domain | NA                  |             | 2        | 7        | 1        |
| 1 phylum | Bacteroidetes       |             | 131      | 113      | 122      |
| 2 class  | Bacteroidia         |             | 0        | 0        | 0        |
| 3 order  | Bacteroidales       |             | 1984     | 1416     | 1736     |
| 4 family | Bacteroidaceae      |             | 263      | 37       | 81       |
| 5 genus  | Bacteroides         |             | 481      | 565      | 454      |
| 6 specy  |                     | coprocola   | 1        | 0        | 0        |
| 6 specy  |                     | fragilis    | 1        | 0        | 0        |
| 4 family | Porphyromonadaceae  |             | 137      | 12       | 147      |
| 5 genus  | Barnesiella         |             | 0        | 0        | 0        |
| 6 specy  |                     | viscericola | 36       | 3        | 1        |
| 5 genus  | Parabacteroides     |             | 0        | 1        | 0        |
| 5 genus  | Proteiniphilum      |             | 0        | 1        | 0        |
| 4 family | Prevotellaceae      |             | 1665     | 1454     | 1213     |
| 5 genus  | Prevotella          |             | 49196    | 48291    | 59317    |
| 2 class  | Flavobacteria       |             | 0        | 0        | 0        |
| 3 order  | Flavobacteriales    |             | 1        | 0        | 0        |
| 4 family | Flavobacteriaceae   |             | 4        | 3        | 2        |
| 5 genus  | Chryseobacterium    |             | 1        | 4        | 1        |
| 2 class  | Sphingobacteria     |             | 0        | 0        | 0        |
| 3 order  | Sphingobacteriales  |             | 0        | 36       | 0        |
| 1 phylum | Cyanobacteria       |             | 18       | 43       | 60       |
| 2 class  | TRUE                |             | 0        | 1        | 0        |
| 1 phylum | Firmicutes          |             | 14048    | 11023    | 8825     |
| 2 class  | Bacilli             |             | 19       | 191      | 1        |
| 3 order  | Bacillales          |             | 37       | 1        | 3        |
| 4 family | Bacillaceae         |             | 5        | 314      | 6        |
| 5 genus  | Bacillus            |             | 10       | 7        | 5        |
| 5 genus  | Exiguobacterium     |             | 1        | 0        | 0        |
| 4 family | Caryophanaceae      |             | 0        | 0        | 0        |
| 5 genus  | Caryophanon         |             | 1        | 1        | 0        |
| 4 family | Staphylococcaceae   |             | 0        | 0        | 0        |
| 5 genus  | Gemella             |             | 1        | 0        | 1        |
| 5 genus  | Jeotgalicoccus      |             | 1        | 0        | 0        |
| 5 genus  | Staphylococcus      |             | 7        | 10       | 2        |
| 5 genus  | Macrococcus         |             | 0        | 1        | 0        |
| 4 family | Alicyclobacillaceae |             | 0        | 0        | 0        |
| 5 genus  | Sulfobacillus       |             | 0        | 1        | 0        |
| 4 family | Planococcaceae      |             | 0        | 0        | 0        |
| 5 genus  | Kurthia             |             | 0        | 1        | 0        |
| 4 family | Paenibacillaceae    |             | 0        | 0        | 0        |
| 5 genus  | Paenibacillus       |             | 0        | 0        | 2        |
| 3 order  | Lactobacillales     |             | 15       | 25       | 18       |
| 4 family | Carnobacteriaceae   |             | 5        | 1        | 1        |
| 5 genus  | Carnobacterium      |             | 2        | 7        | 4        |
| 5 genus  | Granulicatella      |             | 0        | 0        | 1        |
| 4 family | Streptococcaceae    |             | 22       | 12       | 16       |
| 5 genus  | Lactococcus         |             | 2        | 4        | 1        |
| 5 genus  | Streptococcus       |             | 83       | 77       | 95       |
| 6 specy  |                     | suis        | 4        | 3        | 4        |
| 4 family | Aerococcaceae       |             | 0        | 0        | 0        |
| 5 genus  | Aerococcus          |             | 1        | 0        | 0        |
| 4 family | Enterococcaceae     |             | 0        | 0        | 0        |
| 5 genus  | Enterococcus        |             | 5        | 15       | 2        |
| 5 genus  | Tetragenococcus     |             | 1        | 1        | 2        |
| 4 family | Lactobacillaceae    |             | 0        | 0        | 0        |
| 5 genus  | Lactobacillus       |             | 54       | 1957     | 18       |
| 6 specy  |                     | casei       | 0        | 4        | 0        |
| 6 specy  |                     | fermentum   | 0        | 2        | 0        |
| 6 specy  |                     | ruminis     | 0        | 4        | 2        |
| 4 family | Leuconostocaceae    |             | 0        | 0        | 0        |
| 5 genus  | Leuconostoc         |             | 1        | 2        | 2        |

|          |                     |                       |      |      |      |
|----------|---------------------|-----------------------|------|------|------|
| 5 genus  |                     | Weissella             | 2    | 3    | 1    |
| 2 class  | Clostridia          |                       | 415  | 516  | 736  |
| 3 order  |                     | Clostridiales         | 711  | 1098 | 1392 |
| 4 family |                     | Clostridiaceae        | 23   | 35   | 19   |
| 5 genus  |                     | Clostridium           | 3    | 8    | 9    |
| 5 genus  |                     | Sarcina               | 0    | 0    | 1    |
| 4 family |                     | Eubacteriaceae        | 181  | 1024 | 296  |
| 5 genus  |                     | Anaerovorax           | 798  | 1207 | 1837 |
| 5 genus  |                     | Eubacterium           | 1    | 5    | 4    |
| 5 genus  |                     | Mogibacterium         | 469  | 145  | 1458 |
| 4 family |                     | Lachnospiraceae       | 5115 | 3714 | 7067 |
| 5 genus  |                     | Butyrivibrio          | 340  | 2372 | 2010 |
| 5 genus  |                     | Coprococcus           | 3    | 3    | 0    |
| 5 genus  |                     | Dorea                 | 5    | 9    | 7    |
| 5 genus  |                     | Roseburia             | 2    | 1    | 0    |
| 5 genus  |                     | Oribacterium          | 0    | 1    | 1    |
| 4 family |                     | Peptococcaceae        | 242  | 413  | 320  |
| 5 genus  |                     | Peptococcus           | 0    | 1    | 0    |
| 4 family |                     | Peptostreptococcaceae | 8    | 13   | 22   |
| 5 genus  |                     | Parvimonas            | 0    | 1    | 0    |
| 5 genus  |                     | Peptostreptococcus    | 0    | 1    | 1    |
| 4 family |                     | Ruminococcaceae       | 4090 | 6487 | 5431 |
| 5 genus  |                     | Anaerotruncus         | 1    | 0    | 1    |
| 5 genus  |                     | Papillibacter         | 43   | 1    | 1    |
| 5 genus  |                     | Ruminococcus          | 291  | 477  | 595  |
| 5 genus  |                     | Sporobacter           | 49   | 47   | 4189 |
| 5 genus  |                     | Subdoligranulum       | 1    | 1    | 0    |
| 4 family |                     | Syntrophomonadaceae   | 63   | 71   | 102  |
| 5 genus  |                     | Syntrophomonas        | 4    | 3    | 2    |
| 5 genus  |                     | Aminobacterium        | 0    | 1    | 0    |
| 4 family |                     | Veillonellaceae       | 513  | 627  | 615  |
| 5 genus  |                     | Acidaminococcus       | 1    | 0    | 0    |
| 5 genus  |                     | Dialister             | 2    | 1    | 1    |
| 5 genus  |                     | Selenomonas           | 2    | 2    | 6    |
| 5 genus  |                     | Succinoclasticum      | 4981 | 6148 | 4690 |
| 5 genus  |                     | Megamonas             | 0    | 1    | 0    |
| 2 class  | Erysipelotrichi     |                       | 0    | 0    | 0    |
| 3 order  |                     | Erysipelotrichales    | 0    | 0    | 0    |
| 4 family |                     | Erysipelotrichaceae   | 270  | 290  | 193  |
| 5 genus  |                     | Bulleidia             | 58   | 52   | 41   |
| 5 genus  |                     | Catenibacterium       | 2    | 5    | 1    |
| 5 genus  |                     | Turcibacter           | 21   | 26   | 16   |
| 1 phylum | Lentisphaerae       |                       | 1127 | 2331 | 1010 |
| 1 phylum | Proteobacteria      |                       | 28   | 26   | 17   |
| 2 class  | Alphaproteobacteria |                       | 13   | 21   | 17   |
| 3 order  |                     | Rhodospirillales      | 0    | 0    | 0    |
| 4 family |                     | Acetobacteraceae      | 2    | 2    | 3    |
| 3 order  |                     | Sphingomonadales      | 0    | 1    | 0    |
| 4 family |                     | Erythrobacteraceae    | 0    | 0    | 0    |
| 5 genus  |                     | Erythrobacter         | 1    | 0    | 0    |
| 4 family |                     | Sphingomonadaceae     | 0    | 0    | 4    |
| 5 genus  |                     | Sphingomonas          | 0    | 2    | 0    |
| 3 order  |                     | Rhizobiales           | 0    | 0    | 3    |
| 4 family |                     | Rhizobiaceae          | 0    | 0    | 0    |
| 5 genus  |                     | Rhizobium             | 0    | 2    | 0    |
| 3 order  |                     | Rhodobacterales       | 0    | 0    | 0    |
| 4 family |                     | Rhodobacteraceae      | 0    | 1    | 0    |
| 5 genus  |                     | Paracoccus            | 0    | 0    | 1    |
| 2 class  | Betaproteobacteria  |                       | 1    | 0    | 0    |
| 3 order  |                     | Burkholderiales       | 2    | 2    | 0    |
| 4 family |                     | Burkholderiaceae      | 2    | 1    | 0    |
| 5 genus  |                     | Limnobacter           | 2    | 1    | 0    |
| 5 genus  |                     | Pandoraea             | 1    | 0    | 0    |
| 5 genus  |                     | Burkholderia          | 0    | 1    | 0    |

|          |                        |      |      |      |
|----------|------------------------|------|------|------|
| 4 family | Comamonadaceae         | 37   | 72   | 52   |
| 5 genus  | Comamonas              | 3    | 1    | 5    |
| 5 genus  | Delftia                | 1    | 0    | 0    |
| 5 genus  | Diaphorobacter         | 0    | 1    | 0    |
| 5 genus  | Hydrogenophaga         | 0    | 1    | 2    |
| 5 genus  | Acidovorax             | 0    | 0    | 1    |
| 4 family | Oxalobacteraceae       | 1    | 0    | 4    |
| 4 family | Unassigned             | 0    | 0    | 0    |
| 5 genus  | Aquabacterium          | 1    | 2    | 1    |
| 4 family | Alcaligenaceae         | 0    | 0    | 1    |
| 5 genus  | Tetrathiobacter        | 0    | 1    | 0    |
| 3 order  | Neisseriales           | 0    | 0    | 0    |
| 4 family | Neisseriaceae          | 3    | 10   | 2    |
| 2 class  | Deltaproteobacteria    | 11   | 15   | 6    |
| 3 order  | Desulfuromonadales     | 35   | 22   | 25   |
| 4 family | Geobacteraceae         | 0    | 1    | 0    |
| 3 order  | Bdellovibrionales      | 0    | 0    | 0    |
| 4 family | Bdellovibrionaceae     | 0    | 0    | 0    |
| 5 genus  | Bdellovibrio           | 29   | 0    | 0    |
| 3 order  | Desulfobacterales      | 0    | 0    | 0    |
| 4 family | Desulfobulbaceae       | 0    | 2    | 2    |
| 5 genus  | Desulfobulbus          | 15   | 11   | 19   |
| 4 family | Desulfobacteraceae     | 0    | 0    | 1    |
| 3 order  | Desulfovibrionales     | 0    | 0    | 0    |
| 4 family | Desulfovibrionaceae    | 1822 | 2559 | 1994 |
| 5 genus  | Desulfovibrio          | 293  | 233  | 291  |
| 5 genus  | Lawsonia               | 1    | 0    | 0    |
| 5 genus  | Bilophila              | 0    | 1    | 0    |
| 4 family | Desulfomicrobiaceae    | 0    | 0    | 0    |
| 5 genus  | Desulfomicrobium       | 0    | 1    | 0    |
| 3 order  | Syntrophobacterales    | 0    | 0    | 0    |
| 4 family | Syntrophaceae          | 0    | 0    | 1    |
| 5 genus  | Smithella              | 1    | 0    | 0    |
| 3 order  | Myxococcales           | 0    | 6    | 2    |
| 4 family | Polyangiaceae          | 0    | 1    | 2    |
| 2 class  | Gammaproteobacteria    | 1095 | 1264 | 694  |
| 3 order  | Alteromonadales        | 91   | 1    | 11   |
| 4 family | Pseudoalteromonadaceae | 0    | 0    | 0    |
| 5 genus  | Pseudoalteromonas      | 5    | 4    | 0    |
| 4 family | Shewanellaceae         | 0    | 0    | 0    |
| 5 genus  | Shewanella             | 3    | 2    | 1    |
| 3 order  | Aeromonadales          | 0    | 0    | 0    |
| 4 family | Succinivibrionaceae    | 1    | 80   | 72   |
| 3 order  | Legionellales          | 0    | 0    | 0    |
| 4 family | Legionellaceae         | 0    | 0    | 0    |
| 5 genus  | Legionella             | 1    | 0    | 0    |
| 3 order  | Pasteurellales         | 0    | 0    | 0    |
| 4 family | Pasteurellaceae        | 7    | 2    | 6    |
| 5 genus  | Haemophilus            | 1    | 0    | 1    |
| 5 genus  | Actinobacillus         | 0    | 1    | 0    |
| 5 genus  | Mannheimia             | 0    | 1    | 0    |
| 3 order  | Pseudomonadales        | 0    | 0    | 0    |
| 4 family | Moraxellaceae          | 0    | 0    | 0    |
| 5 genus  | Acinetobacter          | 2    | 0    | 0    |
| 3 order  | Vibrionales            | 0    | 0    | 0    |
| 4 family | Vibrionaceae           | 6    | 3    | 1    |
| 5 genus  | Photobacterium         | 165  | 113  | 54   |
| 5 genus  | Vibrio                 | 0    | 1    | 0    |
| 3 order  | Xanthomonadales        | 0    | 0    | 0    |
| 4 family | Xanthomonadaceae       | 1    | 1    | 0    |
| 3 order  | Enterobacteriales      | 0    | 0    | 0    |
| 4 family | Enterobacteriaceae     | 0    | 0    | 0    |
| 5 genus  | Escherichia            | 0    | 1    | 0    |
| 2 class  | Epsilonproteobacteria  | 0    | 0    | 0    |

|          |                  |                      |      |      |     |
|----------|------------------|----------------------|------|------|-----|
| 3 order  |                  | Campylobacterales    | 0    | 0    | 0   |
| 4 family |                  | Campylobacteraceae   | 0    | 0    | 0   |
| 5 genus  |                  | Campylobacter        | 12   | 15   | 34  |
| 1 phylum | Spirochaetes     |                      | 25   | 15   | 28  |
| 2 class  | Spirochaetes     |                      | 0    | 0    | 0   |
| 3 order  |                  | Spirochaetales       | 0    | 0    | 0   |
| 4 family |                  | Spirochaetaceae      | 322  | 245  | 53  |
| 5 genus  |                  | Borrelia             | 2    | 5    | 2   |
| 5 genus  |                  | Spirochaeta          | 130  | 154  | 91  |
| 5 genus  |                  | Treponema            | 1042 | 1678 | 767 |
| 1 phylum | TM7              |                      | 173  | 326  | 464 |
| 1 phylum | Verrucomicrobia  |                      | 5    | 19   | 5   |
| 2 class  | Verrucomicrobiae |                      | 0    | 0    | 0   |
| 3 order  |                  | Verrucomicrobiales   | 203  | 157  | 102 |
| 4 family |                  | Akkermansiaceae      | 0    | 0    | 0   |
| 5 genus  |                  | Akkermansia          | 1    | 0    | 1   |
| 4 family |                  | Verrucomicrobiaceae  | 0    | 0    | 1   |
| 2 class  | Opitutae         |                      | 0    | 0    | 0   |
| 3 order  |                  | Opitutales           | 0    | 0    | 0   |
| 4 family |                  | Opitutaceae          | 0    | 0    | 0   |
| 5 genus  |                  | Opitutus             | 0    | 2    | 0   |
| 1 phylum | Euryarchaeota    |                      | 0    | 0    | 0   |
| 1 phylum | Actinobacteria   |                      | 0    | 0    | 0   |
| 2 class  | Actinobacteria   |                      | 4    | 12   | 7   |
| 3 order  |                  | Actinomycetales      | 13   | 23   | 17  |
| 4 family |                  | Microbacteriaceae    | 1    | 0    | 1   |
| 4 family |                  | Micrococcaceae       | 5    | 28   | 4   |
| 5 genus  |                  | Arthrobacter         | 0    | 1    | 0   |
| 5 genus  |                  | Kocuria              | 0    | 0    | 1   |
| 5 genus  |                  | Micrococcus          | 0    | 0    | 2   |
| 4 family |                  | Nocardiopsaceae      | 1    | 0    | 0   |
| 4 family |                  | Corynebacteriaceae   | 0    | 0    | 0   |
| 5 genus  |                  | Corynebacterium      | 4    | 11   | 10  |
| 4 family |                  | Dietziaceae          | 0    | 0    | 0   |
| 5 genus  |                  | Dietzia              | 1    | 2    | 3   |
| 4 family |                  | Streptomycetaceae    | 0    | 0    | 0   |
| 5 genus  |                  | Streptomyces         | 1    | 2    | 1   |
| 4 family |                  | Nocardiaceae         | 0    | 1    | 0   |
| 4 family |                  | Propionibacteriaceae | 0    | 1    | 0   |
| 3 order  |                  | Coriobacteriales     | 0    | 0    | 0   |
| 4 family |                  | Coriobacteriaceae    | 3    | 6    | 12  |
| 5 genus  |                  | Eggerthella          | 9    | 10   | 11  |
| 5 genus  |                  | Atopobium            | 0    | 1    | 0   |
| 3 order  |                  | Acidimicrobiales     | 0    | 1    | 0   |
| 3 order  |                  | Bifidobacteriales    | 0    | 0    | 0   |
| 4 family |                  | Bifidobacteriaceae   | 0    | 1    | 0   |
| 5 genus  |                  | Bifidobacterium      | 0    | 4    | 1   |
| 1 phylum | Fibrobacteres    |                      | 0    | 0    | 0   |
| 2 class  | Fibrobacteria    |                      | 0    | 0    | 0   |
| 3 order  |                  | Fibrobacterales      | 87   | 203  | 36  |
| 4 family |                  | Fibrobacteraceae     | 0    | 0    | 0   |
| 5 genus  |                  | Fibrobacter          | 1    | 5    | 1   |
| 1 phylum | Fusobacteria     |                      | 0    | 0    | 0   |
| 2 class  | Fusobacteria     |                      | 0    | 0    | 0   |
| 3 order  |                  | Fusobacteriales      | 0    | 0    | 0   |
| 4 family |                  | Fusobacteriaceae     | 0    | 0    | 0   |
| 5 genus  |                  | Fusobacterium        | 5    | 4    | 13  |
| 4 family |                  | Leptotrichiaceae     | 0    | 0    | 0   |
| 5 genus  |                  | Sneathia             | 0    | 0    | 1   |
| 1 phylum | Planctomycetes   |                      | 0    | 0    | 0   |
| 2 class  | Planctomycetacia |                      | 0    | 0    | 0   |
| 3 order  |                  | Planctomycetales     | 0    | 0    | 0   |
| 4 family |                  | Planctomycetaceae    | 77   | 242  | 38  |
| 5 genus  |                  | Gemmata              | 1    | 1    | 1   |

|          |                     |   |   |   |
|----------|---------------------|---|---|---|
| 1 phylum | Tenericutes         | 0 | 0 | 0 |
| 2 class  | Mollicutes          | 1 | 3 | 3 |
| 3 order  | Acholeplasmatales   | 0 | 0 | 0 |
| 4 family | Acholeplasmataceae  | 0 | 0 | 0 |
| 5 genus  | Phytoblasma         | 0 | 2 | 0 |
| 3 order  | Anaeroplasmatales   | 0 | 0 | 0 |
| 4 family | Anaeroplasmataceae  | 0 | 0 | 0 |
| 5 genus  | Anaeroplasma        | 0 | 2 | 0 |
| 1 phylum | Acidobacteria       | 0 | 1 | 0 |
| 2 class  | Acidobacteria       | 0 | 0 | 0 |
| 3 order  | Acidobacteriales    | 0 | 0 | 1 |
| 4 family | Acidobacteriaceae   | 0 | 0 | 0 |
| 5 genus  | Gp3                 | 0 | 0 | 1 |
| 1 phylum | Deferribacteres     | 0 | 0 | 0 |
| 2 class  | Deferribacteres     | 0 | 0 | 0 |
| 3 order  | Deferribacterales   | 0 | 0 | 0 |
| 4 family | Unassigned          | 0 | 0 | 0 |
| 5 genus  | Synergistes         | 0 | 3 | 7 |
| 1 phylum | Deinococcus-Thermus | 0 | 0 | 0 |
| 2 class  | Deinococci          | 0 | 0 | 0 |
| 3 order  | Thermales           | 0 | 0 | 0 |
| 4 family | Thermaceae          | 0 | 0 | 0 |
| 5 genus  | Thermus             | 0 | 2 | 0 |
| 1 phylum | Chloroflexi         | 0 | 0 | 2 |
